# Supplementary material
Source: ML conference proceedings conference paper supplement (https://openaccess.thecvf.com/content/CVPR2024/html/Ouasfi_Unsupervised_Occupancy_Learning_CVPR_2024_paper.html)
Supplement: Supplementary file 1 [file Ouasfi_Unsupervised_Occupancy_Learning_CVPR_2024_supplemental.pdf]

# Unsupervised Occupancy Learning from Sparse Point Cloud

## Supplementary Material

### A. Additional Implementation Details

Unless stated differently, We employ publicly accessible official implementations of established methods in our work. Specifically, for SPSR, in accordance with our peer-reviewed competition practices, we utilize publicly available implementations provided by Open3D and Pymeshlab. We select the superior result between the two and tune its hyperparameters including grid searches for parameters such as octree depth and the number of nearest neighbors utilized in constructing the Riemannian graph for normal orientation propagation. It is important to highlight that these libraries feature a normal estimation algorithm grounded in local point cloud co-variance estimation, coupled with normal orientation propagation employing minimum spanning trees.

### B. Metrics

Following the definitions from [2] and [7], we present here the formal definitions for the metrics that we use for evaluation in the main submission. We denote by  $\mathcal{S}$  and  $\hat{\mathcal{S}}$  the ground truth and predicted mesh respectively. We follow [3] to approximate all metrics with 100k samples from  $\mathcal{S}$  and  $\hat{\mathcal{S}}$  for ShapeNet and Faust and with 1M samples for 3Dscene. For SRB, we use 1M samples following [1] and [4].

**Chamfer Distance (CD<sub>1</sub>)** The L<sub>1</sub> Chamfer distance is based on the two-ways nearest neighbor distance:

$$CD_1 = \frac{1}{2|\mathcal{S}|} \sum_{v \in \mathcal{S}} \min_{\hat{v} \in \hat{\mathcal{S}}} \|v - \hat{v}\|_2 + \frac{1}{2|\hat{\mathcal{S}}|} \sum_{\hat{v} \in \hat{\mathcal{S}}} \min_{v \in \mathcal{S}} \|\hat{v} - v\|_2.$$

**Chamfer Distance (CD<sub>2</sub>)** The L<sub>2</sub> Chamfer distance is based on the two-ways nearest neighbor squared distance:

$$CD_2 = \frac{1}{2|\mathcal{S}|} \sum_{v \in \mathcal{S}} \min_{\hat{v} \in \hat{\mathcal{S}}} \|v - \hat{v}\|_2^2 + \frac{1}{2|\hat{\mathcal{S}}|} \sum_{\hat{v} \in \hat{\mathcal{S}}} \min_{v \in \mathcal{S}} \|\hat{v} - v\|_2^2.$$

**F-Score (FS)** For a given threshold  $\tau$ , the F-score between the meshes  $\mathcal{S}$  and  $\hat{\mathcal{S}}$  is defined as:

$$FS(\tau, \mathcal{S}, \hat{\mathcal{S}}) = \frac{2 \text{ Recall} \cdot \text{ Precision}}{\text{ Recall} + \text{ Precision}},$$

where

$$\begin{aligned} \text{Recall}(\tau, \mathcal{S}, \hat{\mathcal{S}}) &= |\{v \in \mathcal{S}, \text{ s.t. } \min_{\hat{v} \in \hat{\mathcal{S}}} \|v - \hat{v}\|_2 \leq \tau\}|, \\ \text{Precision}(\tau, \mathcal{S}, \hat{\mathcal{S}}) &= |\{\hat{v} \in \hat{\mathcal{S}}, \text{ s.t. } \min_{v \in \mathcal{S}} \|\hat{v} - v\|_2 \leq \tau\}|. \end{aligned}$$

Following [5] and [6], we set  $\tau$  to 0.01.

**Normal consistency (NC)** We denote here by  $n_v$  the normal at a point  $v$  in  $\mathcal{S}$ . The normal consistency between two meshes  $\mathcal{S}$  and  $\hat{\mathcal{S}}$  is defined as:

$$NC = \frac{1}{2|\mathcal{S}|} \sum_{v \in \mathcal{S}} n_v \cdot n_{\text{closest}(v, \hat{\mathcal{S}})} + \frac{1}{2|\hat{\mathcal{S}}|} \sum_{\hat{v} \in \hat{\mathcal{S}}} n_{\hat{v}} \cdot n_{\text{closest}(\hat{v}, \mathcal{S})},$$

where

$$\text{closest}(v, \hat{\mathcal{S}}) = \operatorname{argmin}_{\hat{v} \in \hat{\mathcal{S}}} \|v - \hat{v}\|_2.$$

**Hausdorff distance (HD)** This metric is defined as follows:

$$d_H = \max \left( \max_{v \in \mathcal{S}} \min_{\hat{v} \in \hat{\mathcal{S}}} \|v - \hat{v}\|_2, \max_{\hat{v} \in \hat{\mathcal{S}}} \min_{v \in \mathcal{S}} \|\hat{v} - v\|_2 \right)$$

### References

- [1] Yizhak Ben-Shabat, Chamin Hewa Koneputugodage, and Stephen Gould. Digs: Divergence guided shape implicit neural representation for unoriented point clouds. In *CVPR*, 2022. 1
- [2] Alexandre Boulch and Renaud Marlet. Poco: Point convolution for surface reconstruction. In *Proceedings of the IEEE/CVF Conference on Computer Vision and Pattern Recognition*, pages 6302–6314, 2022. 1
- [3] Chao Chen, Zhizhong Han, and Yu-Shen Liu. Unsupervised inference of signed distance functions from single sparse point clouds without learning priors. In *Proceedings of the IEEE/CVF Conference on Computer Vision and Pattern Recognition (CVPR)*, 2023. 1
- [4] Chamin Hewa Koneputugodage, Yizhak Ben-Shabat, and Stephen Gould. Octree guided unoriented surface reconstruction. In *Proceedings of the IEEE/CVF Conference on Computer Vision and Pattern Recognition*, pages 16717–16726, 2023. 1
- [5] Lars Mescheder, Michael Oechsle, Michael Niemeyer, Sebastian Nowozin, and Andreas Geiger. Occupancy networks: Learning 3d reconstruction in function space. In *Proceedings of the IEEE/CVF conference on computer vision and pattern recognition*, pages 4460–4470, 2019. 1
- [6] Songyou Peng, Michael Niemeyer, Lars Mescheder, Marc Pollefeys, and Andreas Geiger. Convolutional occupancy networks. In *European Conference on Computer Vision*, pages 523–540. Springer, 2020. 1
- [7] Francis Williams, Teseo Schneider, Claudio Silva, Denis Zorin, Joan Bruna, and Daniele Panozzo. Deep geometric prior for surface reconstruction. In *CVPR*, 2019. 1
